# Supplementary material
Source: publisher figshare collection journal article supplement (https://acs.figshare.com/ndownloader/files/4106143)
Supplement: Supplementary file 1 [file 4106143]

## SUPPLEMENTARY FIGURES

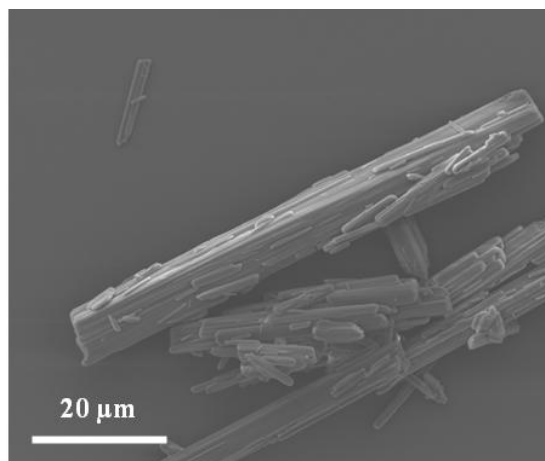

**Figure S1:** SEM micrograph of ritonavir seed crystal before crystal growth experiment.

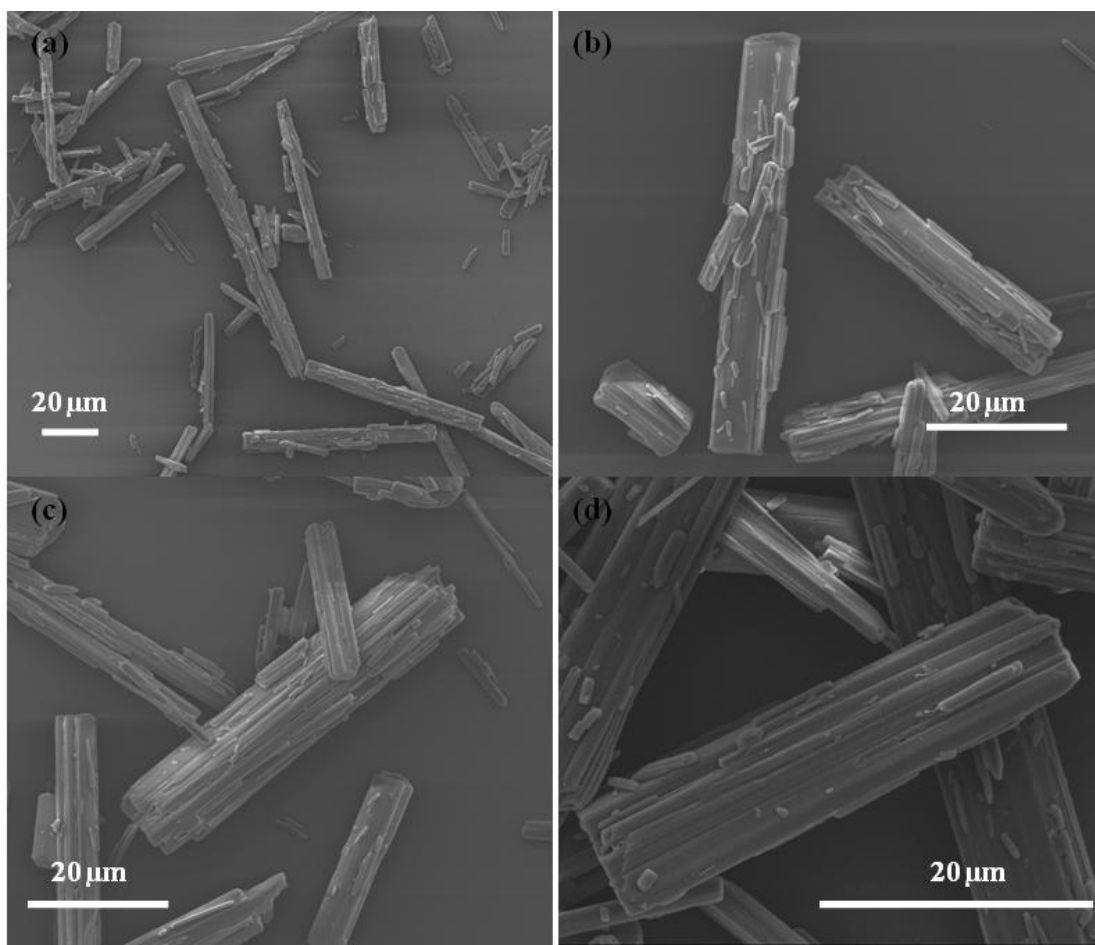

**Figure S2:** SEM micrograph of ritonavir seed crystals grown at an initial ritonavir concentration of 10 μg/mL ( $S = 7.6$ ) in the (a) absence of polymer and in the presence of 5 μg/mL of (b) CAP Adp 0.85, (c) Pn-IPAAmd and (d) CAP Adp 0.85-Pn-IPAAmd (1:1) combination.

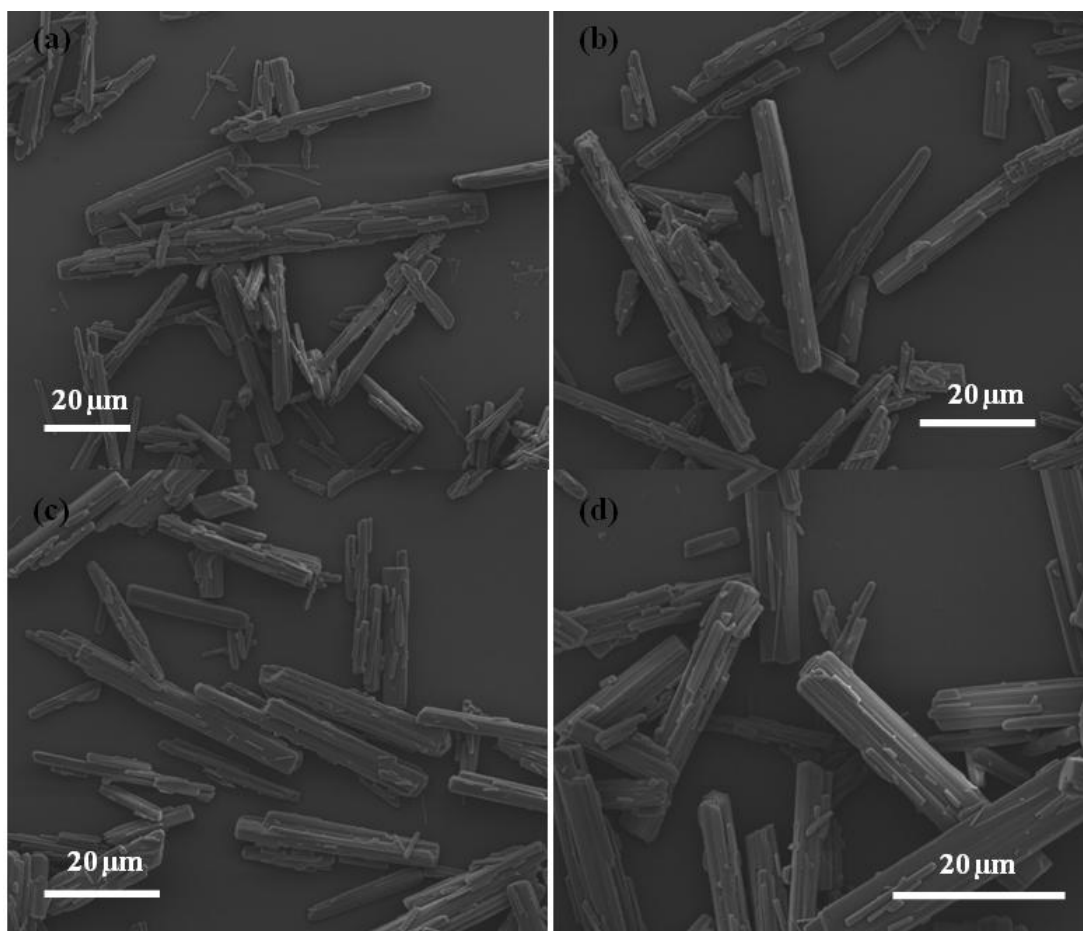

**Figure S3:** SEM micrograph of ritonavir seed crystals grown at an initial ritonavir concentration of 20  $\mu\text{g/mL}$  ( $S = 15.4$ ) in the (a) absence of polymer and in the presence of 5  $\mu\text{g/mL}$  of (b) CAP Adp 0.85, (c) Pn-IPAAmd and (d) CAP Adp 0.85-Pn-IPAAmd (1:1) combination.

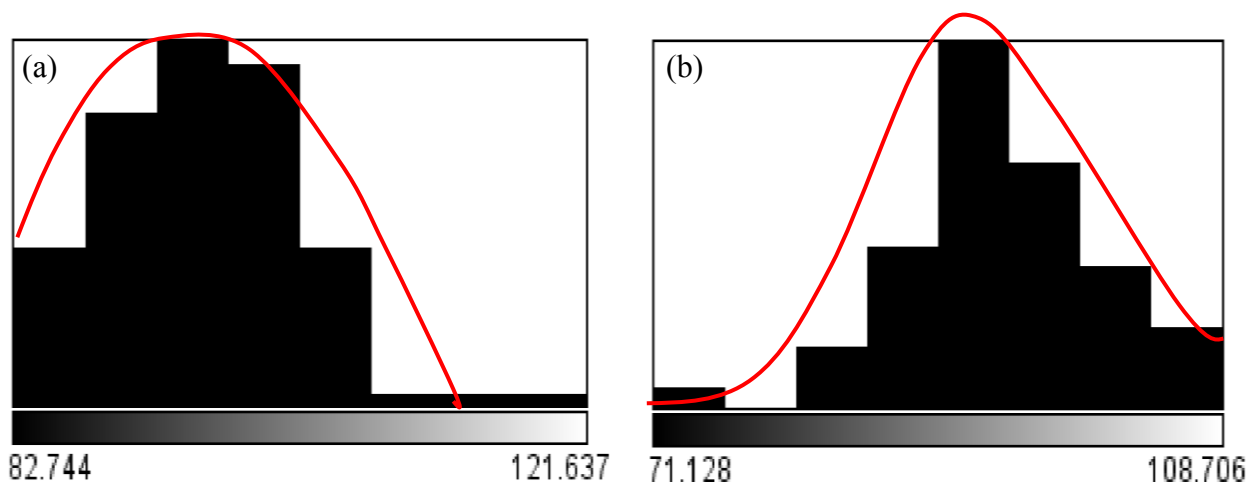

**Figure S4:** Particle size distribution (PSD) of ritonavir seed crystals (a) before and (b) after crystal growth experiment in the absence of polymer at an initial concentration of 10  $\mu\text{g/mL}$ . The horizontal axis represents the pixels not actual crystal size. The PSD after crystal growth experiment is mono-modal; an indicator of absence of significant secondary nucleation.

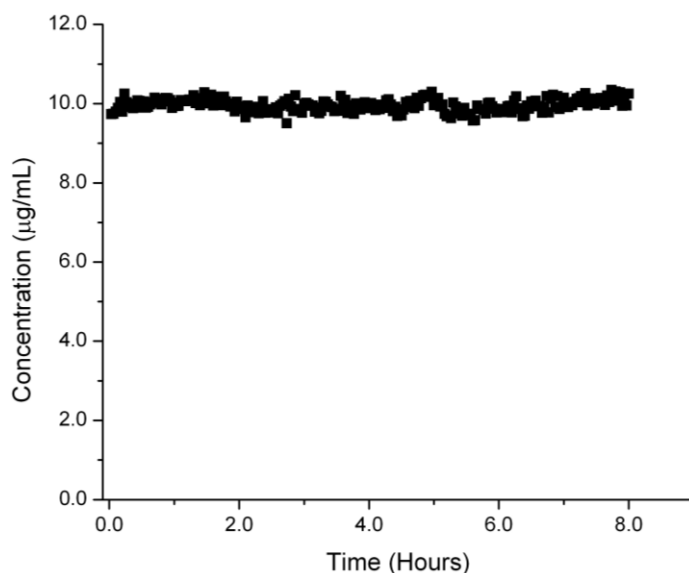

**Figure S5:** Unseeded desupersaturation profile of ritonavir at an initial concentration of 10  $\mu\text{g/mL}$ . The experiment was performed under similar conditions as seeded desupersaturation experiments, (37°C, pH 6.8, 100 mM sodium phosphate buffer). Desupersaturation was not observed over the duration of the experiment (8 hours).
